# Supplementary material for: Astaxanthin Complexes to Attenuate Muscle Damage after In Vivo Femoral Ischemia-Reperfusion
Source: MDPI journal article supplement (doi:10.3390/md17060354), 2019-06-14
Supplement: s1 [file s1]

## Supplementary Material

# Astaxanthin Complexes to Attenuate Muscle Damage after In Vivo Femoral Ischemia-Reperfusion

Marisol Zuluaga Tamayo<sup>1</sup>, Laurence Choudat<sup>2</sup>, Rachida Aid-Launais<sup>1</sup>, Olivier Thibaudeau<sup>3</sup>, Liliane Louedec<sup>1</sup>, Didier Letourneur<sup>1</sup>, Virginie Gueguen<sup>1</sup>, Anne Meddahi-Pellé<sup>1</sup>, Anne Couvelard<sup>2,4</sup> and Graciela Pavon-Djavid<sup>1,\*</sup>

<sup>1</sup>INSERM U1148, Laboratory for Vascular Translational Science, Cardiovascular Bioengineering; Université Paris 13, 99 Av. Jean-Baptiste Clément 93430 Villetaneuse France/ CHU X. Bichat, 46 rue H. Huchard, 75018 Paris.

<sup>2</sup>Pathology Department, Bichat Hospital, AP-HP, 46 rue H. Huchard, 75018 Paris.

<sup>3</sup>University Paris Diderot, Sorbonne Paris Cité.

\* **Corresponding:** Graciela Pavon-Djavid, [graciela.pavon@univ-paris13.fr](mailto:graciela.pavon@univ-paris13.fr)

### Supplementary Figures

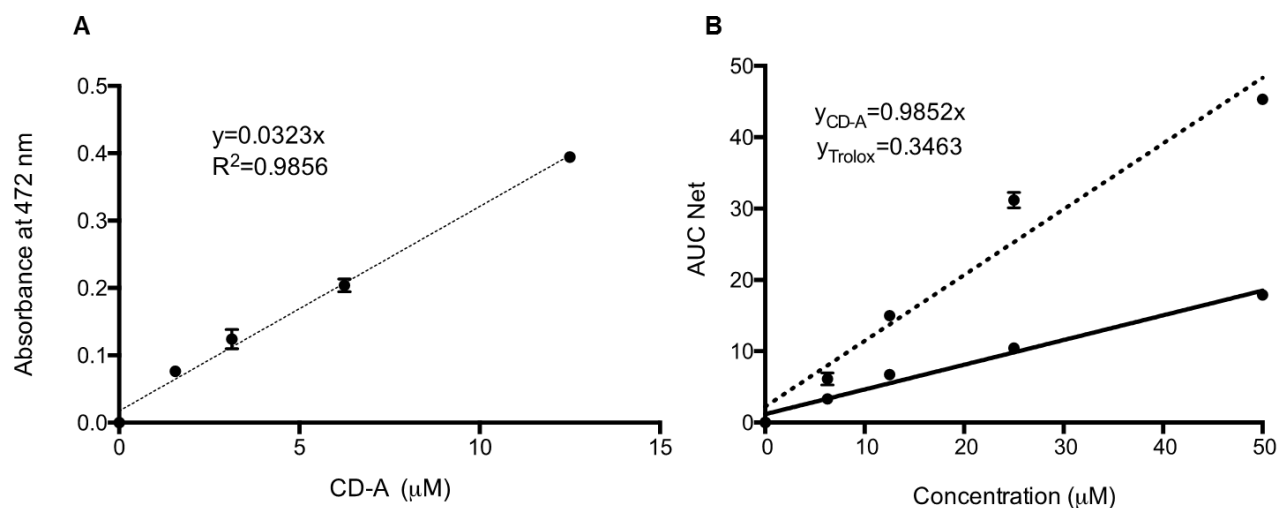

**Figure S1:** (A) Calibration curve of CD-A at concentration ranging from 0-15  $\mu$ M measure at an absorbance of 472 nm. (B) Calibration curve of CD-A and Trolox antioxidant scavenging capacities were analyzed by ORAC method; values are represented as means of AUC net against CD-A or Trolox concentration between 0-50  $\mu$ M.

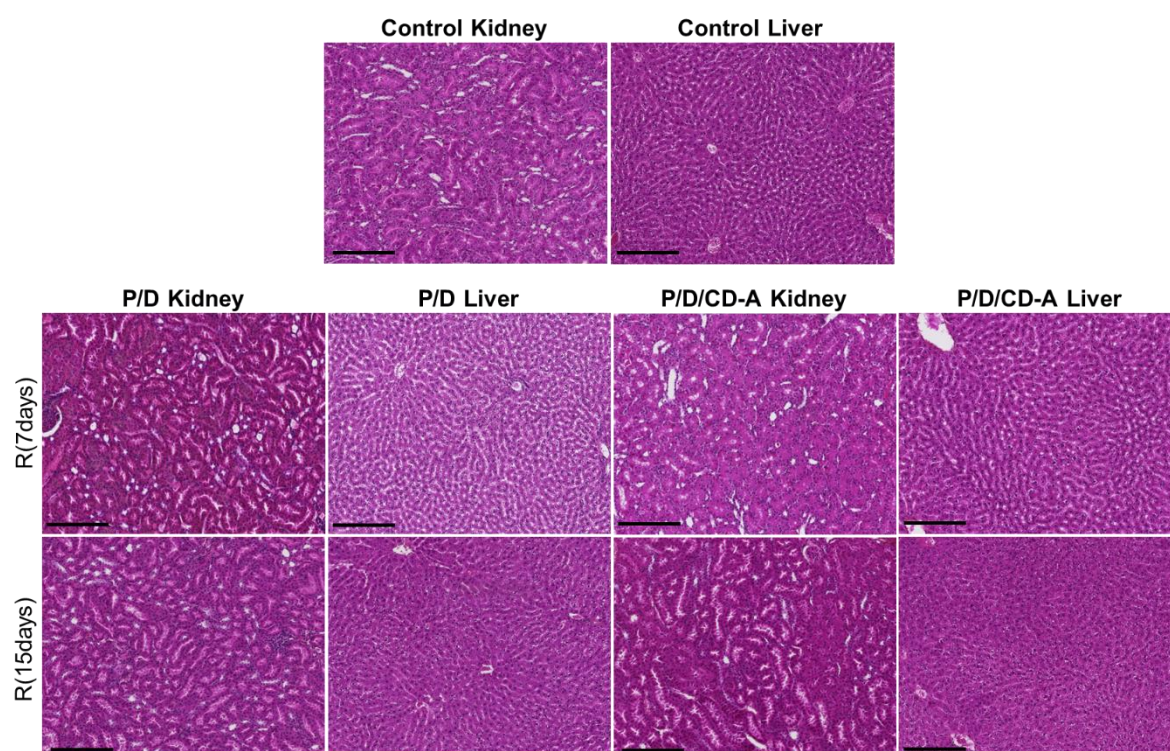

**Figure S2:** Hematoxylin-eosin staining of liver and kidney from control rats and rats which underwent 45 min of ischemia and were subjected to 7 or 15 days of perfusion. Scale bars, 200 μm; magnification 10×.

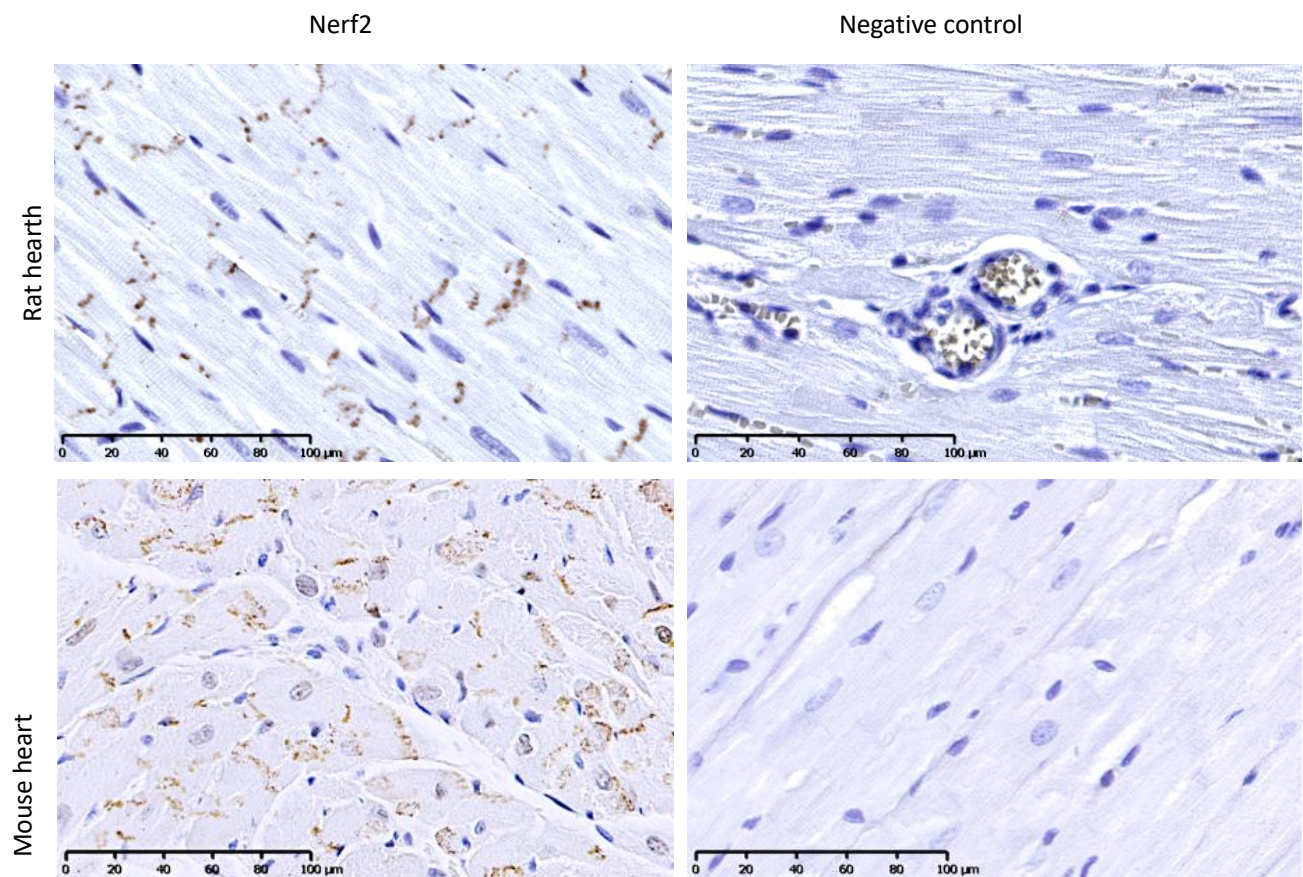

**Figure S3:** Immuno-histological staining of rat and mouse heart showing the positivity of the antibody anti-phospho-Nrf2.

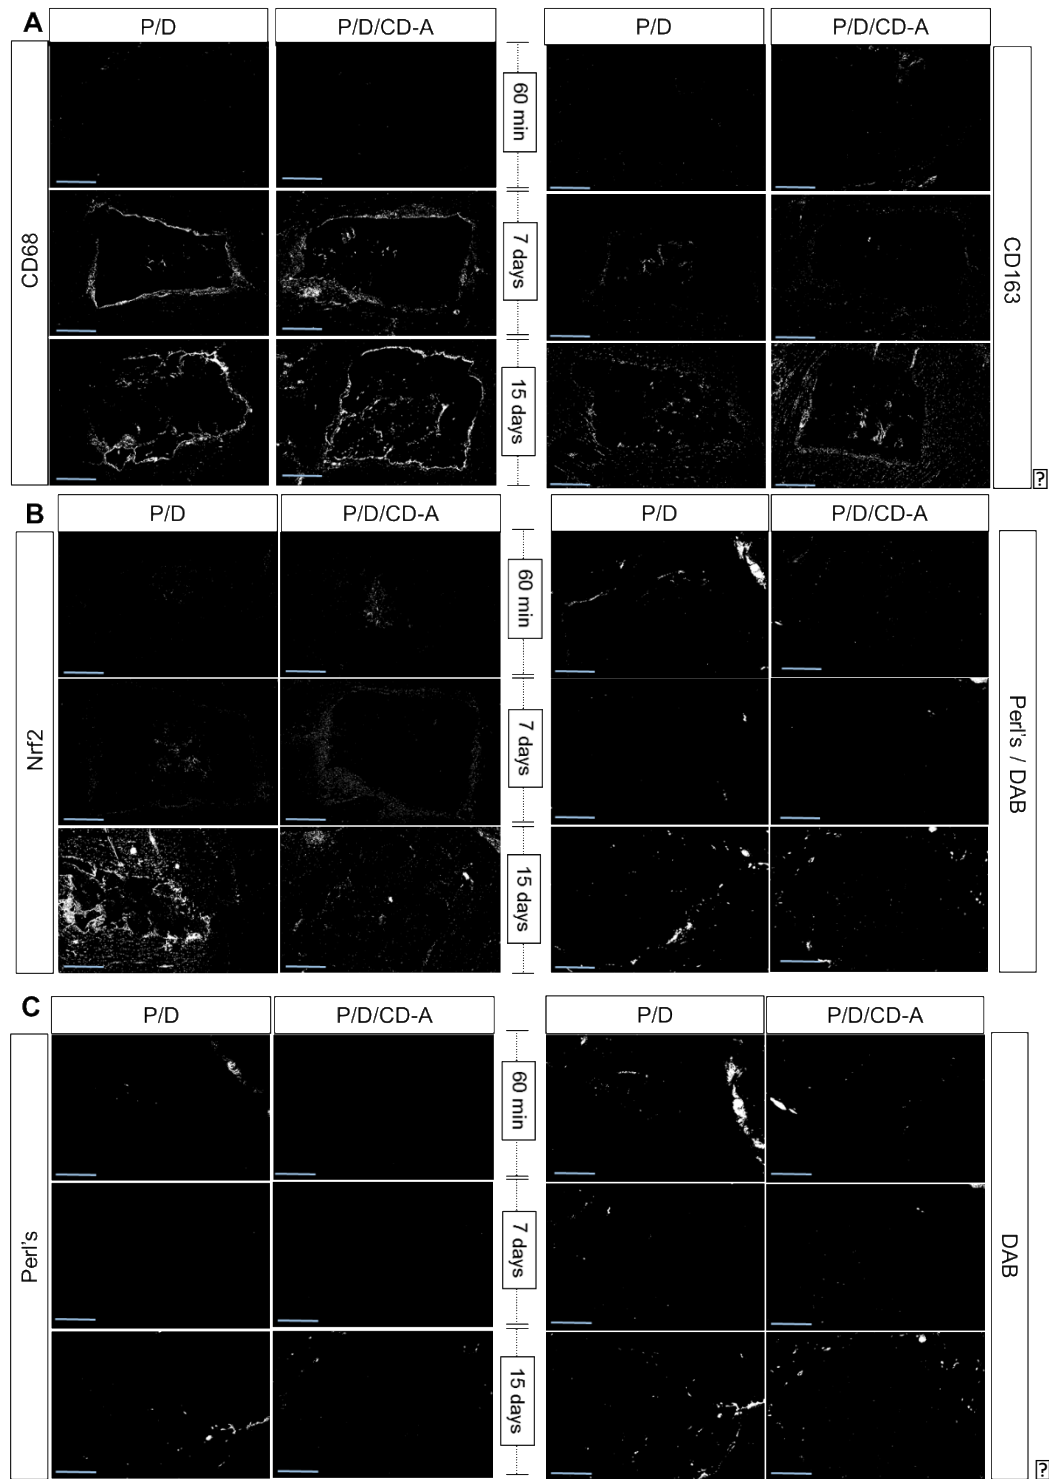

**Figure S4:** Quantification of positive staining using Matlab. (A) CD68 and CD163 samples, (B) Nrf2 and Perl's/DAB samples, and (C) Perl's and DAB samples. White dots in the images represent the positivity of the respective marker. Scale bars, 2 mm. Images are representing of 4 independent experiments.
